# Supplementary material
Source: PubMed Central journal article supplement (PMC7054082)
Supplement: AEM.02889-19-s0001.pdf [file AEM.02889-19-s0001.pdf]

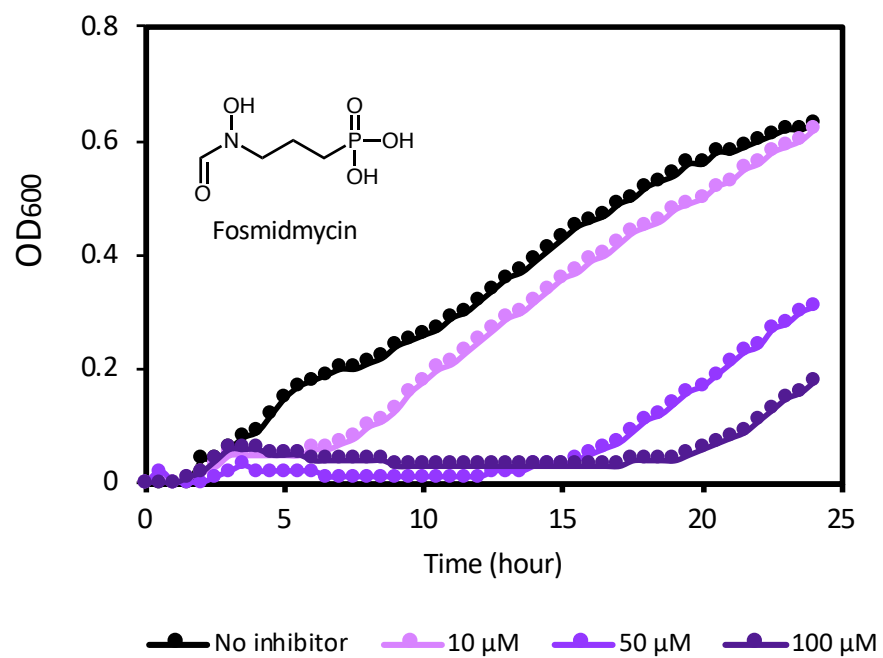

**Figure S1.** The growth curves of *E. coli* DH1 strain cultivated semi-anaerobically with various concentrations of fosmidomycin.
